# Supplementary material
Source: PubMed Central journal article supplement (PMC10195106)
Supplement: NIHMS1888351-supplement-Supplementary_material.pdf [file NIHMS1888351-supplement-Supplementary_material.pdf]

|   |                                                                                                 |   |
|---|-------------------------------------------------------------------------------------------------|---|
| 1 | <b>Table of contents</b>                                                                        |   |
| 2 | Supplementary Table 1: in-house generated antibodies .....                                      | 2 |
| 3 | Supplementary Fig. 1. Cleaved GPV preferentially localises to fibrin adjacent to thrombus. .... | 3 |
| 4 | Supplementary Fig. 2. Exemplified gating strategy based on FSC/SSC characteristics. ....        | 4 |
| 5 | References.....                                                                                 | 5 |
| 6 |                                                                                                 |   |
| 7 |                                                                                                 |   |

1 **Supplementary Table 1: in-house generated antibodies**

| <b>Antigen</b>            | <b>Clone</b> | <b>Source</b>      | <b>Reference</b> |
|---------------------------|--------------|--------------------|------------------|
| Mouse P-selectin          | WUG1.9       | In-house generated | <sup>1</sup>     |
| Mouse GPIIb/IIIa          | JON/A-PE     | In-house generated | <sup>2</sup>     |
| Mouse GPIX                | p0p6         | In-house generated | <sup>3</sup>     |
| Mouse GPV                 | DOM/B        | In-house generated | this study       |
| Mouse GPV                 | DOM/C        | In-house generated | this study       |
| Mouse GPV                 | DOM3         | In-house generated | <sup>4</sup>     |
| Human GPV                 | LUM/B        | In-house generated | this study       |
| Human GPV                 | LUM1         | In-house generated | this study       |
| Human GPV                 | LUM2         | In-house generated | this study       |
| Human GPV                 | LUM3         | In-house generated | this study       |
| Human GPV                 | LUM4         | In-house generated | this study       |
| Human GPV                 | LUM5         | In-house generated | this study       |
| Mouse $\alpha$ 2 integrin | LEN/B        | In-house generated | <sup>5</sup>     |
| Mouse/human GPVI          | JAQ1         | In-house generated | <sup>6</sup>     |
| Mouse GPIIb/IIIa          | JON1         | In-house generated | <sup>4</sup>     |
| Mouse GPIIIa              | EDL1         | In-house generated | <sup>4</sup>     |
| Mouse Integrin $\alpha$ 2 | LEN1         | In-house generated | <sup>7</sup>     |
| Mouse Integrin $\alpha$ 5 | BAR1         | In-house generated | <sup>8</sup>     |
| Mouse CD9                 | ULF1         | In-house generated | <sup>9</sup>     |
| Mouse CD84                | JER-1        | In-house generated | <sup>10</sup>    |

|                          |       |                    |    |
|--------------------------|-------|--------------------|----|
| Mouse GPIb $\alpha$      | p0p/B | In-house generated | 11 |
| Mouse GPIb $\alpha$      | p0p4  | In-house generated | 12 |
| Mouse/human GPIb $\beta$ | p0p1  | In-house generated | 13 |

2

3 The novel antibodies were generated by hybridoma technology following immunisation of *Gp5<sup>-/-</sup>*  
 4 mice or Wistar rats with recombinant hGPV protein or GPV immunoprecipitated from mouse or  
 5 human platelet lysates.

6

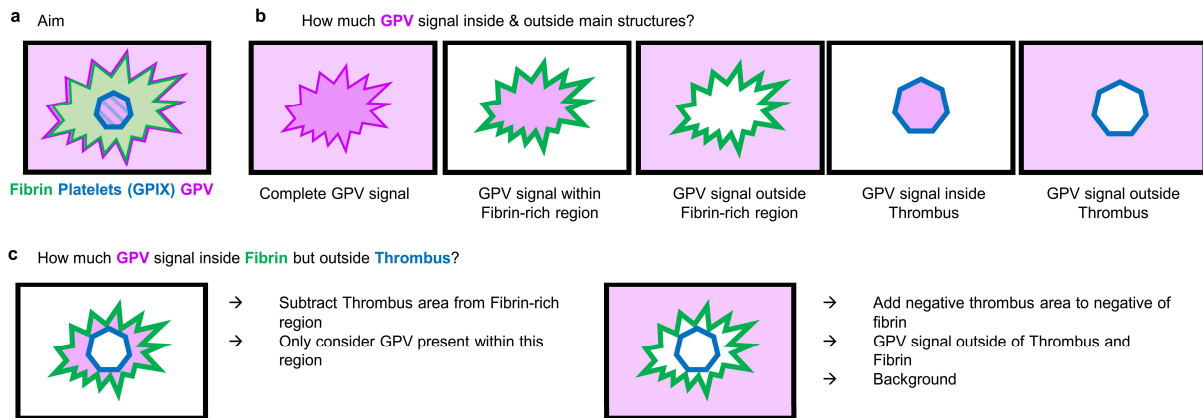

7

8 **Supplementary Fig. 1. Cleaved GPV preferentially localises to fibrin adjacent to thrombus.**

9 **(a)** Image analysis pipeline to quantify GPV intensities (stained with AF546-labeled DOM/C)  
 10 inside fibrin fibres (Fibrin(ogen) AF488) and outside the thrombus (platelets labelled with anti-  
 11 GPIX derivative AF405). **(b)** First, GPV signal was analysed inside and outside the  
 12 thrombus/fibrin. **(c)** GPV intensities was calculated inside fibrin but outside GPIX-positive area.

13

14

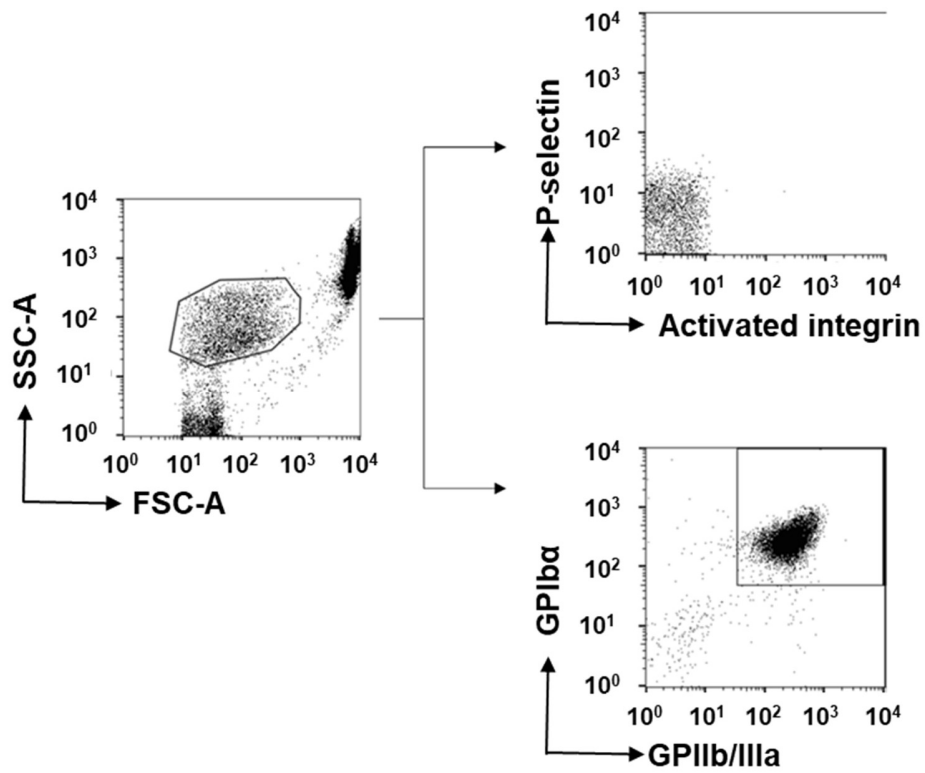

15

16 **Supplementary Fig. 2. Exemplified gating strategy based on FSC/SSC characteristics.**

17

18

19

**References**

- 20 1 Schulte, V. *et al.* Targeting of the collagen-binding site on glycoprotein VI is not essential  
21 for in vivo depletion of the receptor. *Blood* **101**, 3948-3952, doi:10.1182/blood-2002-10-  
22 3242 (2003).
- 23 2 Bergmeier, W. *et al.* Flow cytometric detection of activated mouse integrin  $\alpha$ IIb $\beta$ 3  
24 with a novel monoclonal antibody. *Cytometry* **48**, 80-86, doi:10.1002/cyto.10114 (2002).
- 25 3 Stegner, D. *et al.* Thrombopoiesis is spatially regulated by the bone marrow vasculature.  
26 *Nature communications* **8**, 127, doi:10.1038/s41467-017-00201-7 (2017).
- 27 4 Nieswandt, B., Bergmeier, W., Rackebrandt, K., Gessner, J. E. & Zirngibl, H.  
28 Identification of critical antigen-specific mechanisms in the development of immune  
29 thrombocytopenic purpura in mice. *Blood* **96**, 2520-2527 (2000).
- 30 5 Shida, Y. *et al.* Analysis of the role of von Willebrand factor, platelet glycoprotein VI-,  
31 and  $\alpha$ 2 $\beta$ 1-mediated collagen binding in thrombus formation. *Blood* **124**, 1799-1807,  
32 doi:10.1182/blood-2013-09-521484 (2014).
- 33 6 Nieswandt, B. *et al.* Long-term antithrombotic protection by in vivo depletion of platelet  
34 glycoprotein VI in mice. *J. Exp. Med.* **193**, 459-469, doi:10.1084/jem.193.4.459 (2001).
- 35 7 Nieswandt, B. *et al.* Expression and function of the mouse collagen receptor glycoprotein  
36 VI is strictly dependent on its association with the FcR $\gamma$  chain. *J. Biol. Chem.* **275**,  
37 23998-24002, doi:10.1074/jbc.M003803200 (2000).
- 38 8 Gruner, S. *et al.* Multiple integrin-ligand interactions synergize in shear-resistant platelet  
39 adhesion at sites of arterial injury in vivo. *Blood* **102**, 4021-4027, doi:10.1182/blood-2003-  
40 05-1391 (2003).
- 41 9 Nieswandt, B. *et al.* Glycoprotein VI but not  $\alpha$ 2 $\beta$ 1 integrin is essential for platelet  
42 interaction with collagen. *The EMBO Journal* **20**, 2120-2130,  
43 doi:10.1093/emboj/20.9.2120 (2001).
- 44 10 Hofmann, S., VÖGtle, T., Bender, M., Rose-John, S. & Nieswandt, B. The SLAM family  
45 member CD84 is regulated by ADAM10 and calpain in platelets. *J. Thromb. Haemost.* **10**,  
46 2581-2592, doi:10.1111/jth.12013 (2012).
- 47 11 Massberg, S. *et al.* A crucial role of glycoprotein VI for platelet recruitment to the injured  
48 arterial wall in vivo. *J. Exp. Med.* **197**, 41-49 (2003).
- 49 12 Bergmeier, W., Rackebrandt, K., Schroder, W., Zirngibl, H. & Nieswandt, B. Structural  
50 and functional characterization of the mouse von Willebrand factor receptor GPIb-IX with  
51 novel monoclonal antibodies. *Blood* **95**, 886-893 (2000).
- 52 13 Nieswandt, B. *et al.* Acute systemic reaction and lung alterations induced by an antiplatelet  
53 integrin GPIIb/IIIa antibody in mice. *Blood* **94**, 684-693 (1999).

54
